# Supplementary material
Source: Springer Nature journal article supplement (https://www.springermedizin.de/resource/supplementary/12875_2010_517_MOESM7_ESM.pdf/9434788)

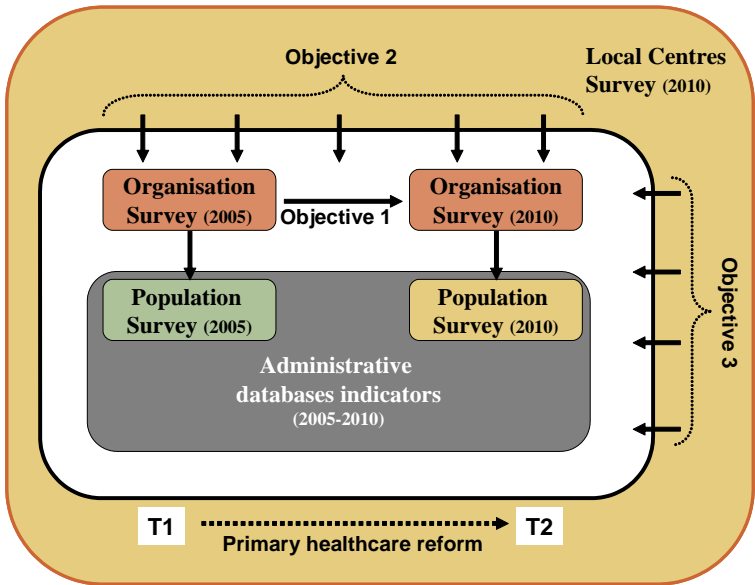

Supplement: MOESM7 [file 9434788]
